# Supplementary material
Source: PubMed Central journal article supplement (PMC5296279)
Supplement: NIHMS835410-supplement-1.pdf [file NIHMS835410-supplement-1.pdf]

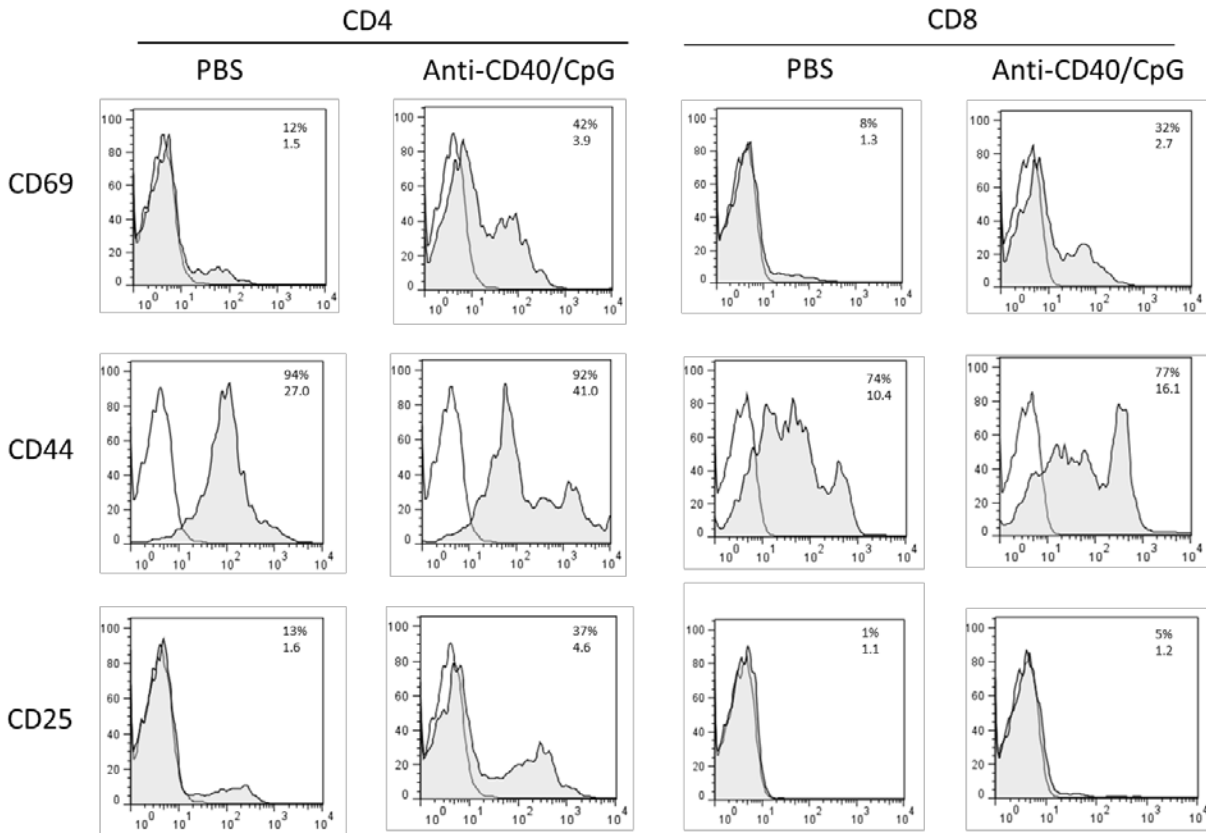

**Supplemental Figure 1.** Anti-CD40 and CpG induce systemic activation of T cells. C57BL/6 mice (3 mice per group) were injected s.c. in the left side of abdomen with  $2 \times 10^6$  B78 cells (day 0). On day 7 the mice were injected i.p. with anti-CD40, and on day 10 they received CpG i.t. Control mice received PBS. On day 11 inguinal lymph nodes were collected, pooled and stained with anti-CD4, anti-CD8, and antibodies against T cell activation markers. The left inguinal lymph nodes were pooled and data from them are included as Figure 2. The right inguinal lymph nodes from these same animals were pooled and data from them are shown here. The results are shown as histograms of viable lymph node cells gated on either CD4<sup>+</sup> or CD8<sup>+</sup> cells. Grey areas show staining with specific antibodies, white areas show isotype controls. Numbers above indicate percentage of positive cells and numbers below indicate mean fluorescent intensity.
